# Supplementary material for: A CpG-Oligodeoxynucleotide Suppresses Th2/Th17 Inflammation by Inhibiting IL-33/ST2 Signaling in Mice from a Model of Adoptive Dendritic Cell Transfer of Smoke-Induced Asthma
Source: MDPI journal article supplement (doi:10.3390/ijms24043130), 2023-02-04
Supplement: s1 [file s1]

**Table S1. Sequence of primers for real-time PCR for mouse**

| Gene          | 5'to 3' Sequence      | Size   |
|---------------|-----------------------|--------|
| <i>IL-33</i>  | CAAGCATTTGCTGCGTCTGT  | 116 bp |
|               | TTCTCCAAAACAAAATAAC   |        |
| <i>TSLP</i>   | CCTTCCTCAGCACACAATTG  | 170 bp |
|               | TGATAAGCTGGCTCACAGAA  |        |
| <i>IL-13</i>  | ACCCAACAACCACCTATGCT  | 150 bp |
|               | TGCACTCATTGGTGGAGGTA  |        |
| <i>Muc5ac</i> | TGACCAAGAGCTCCGTCTTA  | 122 bp |
|               | GAAGAGCAGCCCCAGCCTAG  |        |
| <i>COL1A1</i> | TGGCCCTCCTGGCAAGAATG  | 104 bp |
|               | TTCCAGGCAATCCACGAGC   |        |
| <i>IL-17A</i> | TCATCCCTCAAAGCTCAGCG  | 112 bp |
|               | CTTCTGGAGCTCACTTTTGC  |        |
| <i>GAPDH</i>  | CCTGGATACCGCAGCTAGGA  | 112 bp |
|               | GCGGCGCAATACGAATGCCCC |        |

**Table S2. Sequence of primers for real-time PCR for HBE**

| Gene         | 5'to 3' Sequence     | Size   |
|--------------|----------------------|--------|
| <i>IL-33</i> | AACAGCAGTCTACTGTGGAG | 151 bp |
|              | TCAACACCGTCACCTGATT  |        |
| <i>TSLP</i>  | GCAATCGGCCACATTGCCTT | 136 bp |
|              | TCCGAATAGCCTGGGCACCA |        |
| <i>GAPDH</i> | GCTCATTTGCAGGGGGGAG  | 138 bp |
|              | GTTGGTGGTGCAGGAGGCA  |        |

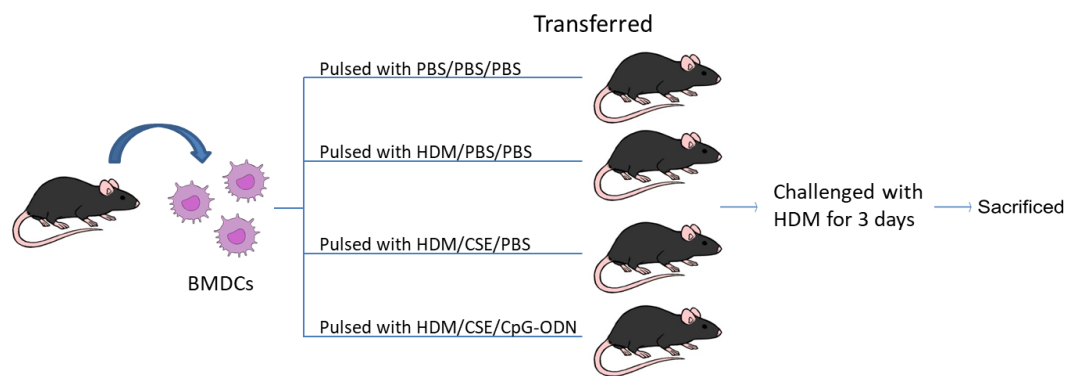

**Figure S1. Experimental protocol for the study.**

BMDCs were generated from the bone marrow of C57BL/6 mice. At day 8 of culture, BMDCs were pulsed overnight with PBS, HDM, CSE or CpG-ODN. At day 9,  $1 \times 10^6$  cells were injected into the tracheas of anesthetized C57BL/6 recipients. On days 10–12 after adoptive transferred of BMDCs, the mice were challenged intranasally with HDM. On day 13, the animals were sacrificed for the acquisition of BALF, lung homogenate and lung sectioning.
